# Supplementary material for: University Students’ Lifestyle Behaviors during the COVID-19 Pandemic: A Four-Wave Longitudinal Survey
Source: MDPI journal article supplement (doi:10.3390/ijerph18178998), 2021-08-26
Supplement: s1 [file s1]

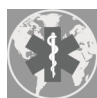

**Table S1.** Characteristics of survey respondents at the four timepoints.

| Characteristics           | T1<br>(N = 1294) | T2<br>(N = 373) | T3<br>(N = 284) | T4<br>(N = 160) |
|---------------------------|------------------|-----------------|-----------------|-----------------|
|                           | Number (%)       | Number (%)      | Number (%)      | Number (%)      |
| <b>Sex</b>                |                  |                 |                 |                 |
| Female                    | 1006 (77.7)      | 310 (83.1)      | 232 (81.7)      | 124 (77.5)      |
| Male                      | 268 (20.7)       | 54 (14.5)       | 44 (15.5)       | 29 (18.1)       |
| Other                     | 20 (1.6)         | 9 (2.4)         | 8 (2.8)         | 7 (4.4)         |
| <b>University</b>         |                  |                 |                 |                 |
| Nîmes                     | 558 (43.12)      | 179 (47.99)     | 142 (50)        | 78 (48.75)      |
| Lorraine                  | 370 (28.59)      | 82 (22.25)      | 70 (24.65)      | 47 (29.38)      |
| Strasbourg                | 212 (16.38)      | 64 (17.16)      | 39 (13.73)      | 23 (14.38)      |
| UCO Angers                | 86 (6.65)        | 20 (5.36)       | 12 (4.23)       | 5 (3.13)        |
| Others                    | 68 (5.26)        | 29 (7.77)       | 21 (7.39)       | 7 (4.38)        |
| <b>Education level</b>    |                  |                 |                 |                 |
| Undergraduate             |                  |                 |                 |                 |
| First year                | 486 (37.56)      | 100 (26.81)     | 96 (33.80)      | 57 (35.63)      |
| Second year               | 314 (24.27)      | 106 (28.42)     | 72 (25.35)      | 47 (29.38)      |
| Third year                | 323 (24.96)      | 98 (26.27)      | 69 (24.30)      | 35 (21.88)      |
| Master's                  |                  |                 |                 |                 |
| Fourth year               | 82 (6.34)        | 34 (9.12)       | 27 (24.30)      | 15 (9.38)       |
| Fifth year                | 74 (5.72)        | 26 (6.97)       | 13 (4.58)       | 3 (1.88)        |
| PhD                       | 11 (.85)         | 8 (2.14)        | 6 (2.11)        | 3 (1.88)        |
| Undefined                 | 4 (.31)          | 2 (.54)         | 1 (.35)         | 0               |
| <b>Place of residence</b> |                  |                 |                 |                 |
| Parental home             | 911 (70.40)      | 215 (57.64)     | 78 (27.46)      | 73 (45.63)      |
| Own accommodation         | 383 (29.60)      | 158 (42.36)     | 206 (72.54)     | 87 (54.37)      |

*Note.* Concerning the level of education, numbers are based on participants' responses at T1.
